# Supplementary material for: N, O and P co-doped honeycomb-like hierarchical porous carbon derived from Sophora japonica for high performance supercapacitors
Source: Royal Society of Chemistry journal article supplement (doi:10.1039/c9ra06934h), 2019-01-01
Supplement: c9ra06934h1.pdf [file c9ra06934h1.pdf]

## Supporting Information

### **N, O and P Co-doped Honeycomb-like Hierarchical Porous Carbon Derived from *Sophora Japonica* for High Performance Supercapacitors**

Li zhang, Yuxia Zhu, Guangzhen Zhao, Yanjiang Li, Guang Zhu\*

Key Laboratory of Spin Electron and Nanomaterials of Anhui Higher Education  
Institutes, Suzhou University, Suzhou 234000, PR China

\*Corresponding author, E-mail: [guangzhu@ahszu.edu.cn](mailto:guangzhu@ahszu.edu.cn)

## **1. Characterization**

The surface morphologies and microstructures of all samples were observed by transmission electron microscopy (TEM, Tecnai G2 F20), high resolution transmission electron microscopy (HRTEM), selected area electron diffraction (SAED) and scanning electron microscopy (SEM, SU1510). The crystallinity of the samples was characterized by Raman spectroscopy (Horiba Jobin Yvon LabRAM HR800) and X-ray diffraction (XRD, Rigaku Smartlab). The chemical bond structure and elemental analysis of materials were examined by the X-ray photoelectron spectroscope (XPS) using Thermo Scientific ESCALab 250Xi system. The N<sub>2</sub> adsorption/desorption isotherms of as-prepared samples were obtained by ASAP 2020 system (Micrometitics, Norcross, GA). The Brunauer-Emett-Teller (BET) specific surface areas (SSA), total pore volumes ( $V_{\text{total}}$ ) and pore size distributions were analyzed through N<sub>2</sub> adsorption/desorption isotherms.

## **2. Electrochemical measurements**

In a three-electrode system, the electrochemical performances of as-prepared samples were measured by electrochemical workstation (Metrohm, AUTOLAB). The obtained slurry was fabricated by mixing the obtained electrode sample (80%), polyvinylidene fluoride (PVDF, 10%) and acetylene black (10%) using a certain amount of N-methyl-2-pyrrolidone (NMP) as solvent, which was cast on a carbon paper (20 × 35 mm<sup>2</sup>) and dried (80 °C for 12 h) as working electrode. Ag/AgCl electrode and a Pt foil electrode (20 × 20 mm<sup>2</sup>) were used as reference and counter electrode, respectively. The electrochemical impedance spectroscopy at an open circuit potential with amplitude of 5 mV in the frequency range of 0.01-100000 Hz (EIS), cyclic voltammetry (CV), and galvanostatic charge-discharge (GCD) were

measured using a 6 M KOH aqueous solution. The specific capacitances ( $C$ ,  $F\ g^{-1}$ ) of all samples were obtained from the GCD curves as follows:

$$C = \frac{I_d \times \Delta t}{m \times \Delta V} \quad (1)$$

where  $\Delta V$  (V),  $I_d$  (A),  $\Delta t$  (s) and  $m$  (g) is the applied voltage window, the discharge current, discharge time and the mass of active materials.

The symmetrical SC was assembled by two N-P-HHPC-3 electrodes and measured using a two electrode system. CV, GCD and cycle life measurements (CHI660E, Chenhua Instruments Co. Ltd., Shanghai) were tested in 1 M  $Na_2SO_4$  gel electrolyte and EMIMBF<sub>4</sub> solution, respectively. The specific capacitance ( $C$ ,  $F\ g^{-1}$ ), energy density ( $E$ ,  $Wh\ kg^{-1}$ ) and power density ( $P$ ,  $W\ kg^{-1}$ ) of symmetrical SC can be calculated by the GCD curves as following equations:

$$E = \frac{1}{7.2} \times C \times \Delta V^2 \quad (2)$$

$$P = 3600 \times \frac{E}{\Delta t} \quad (3)$$

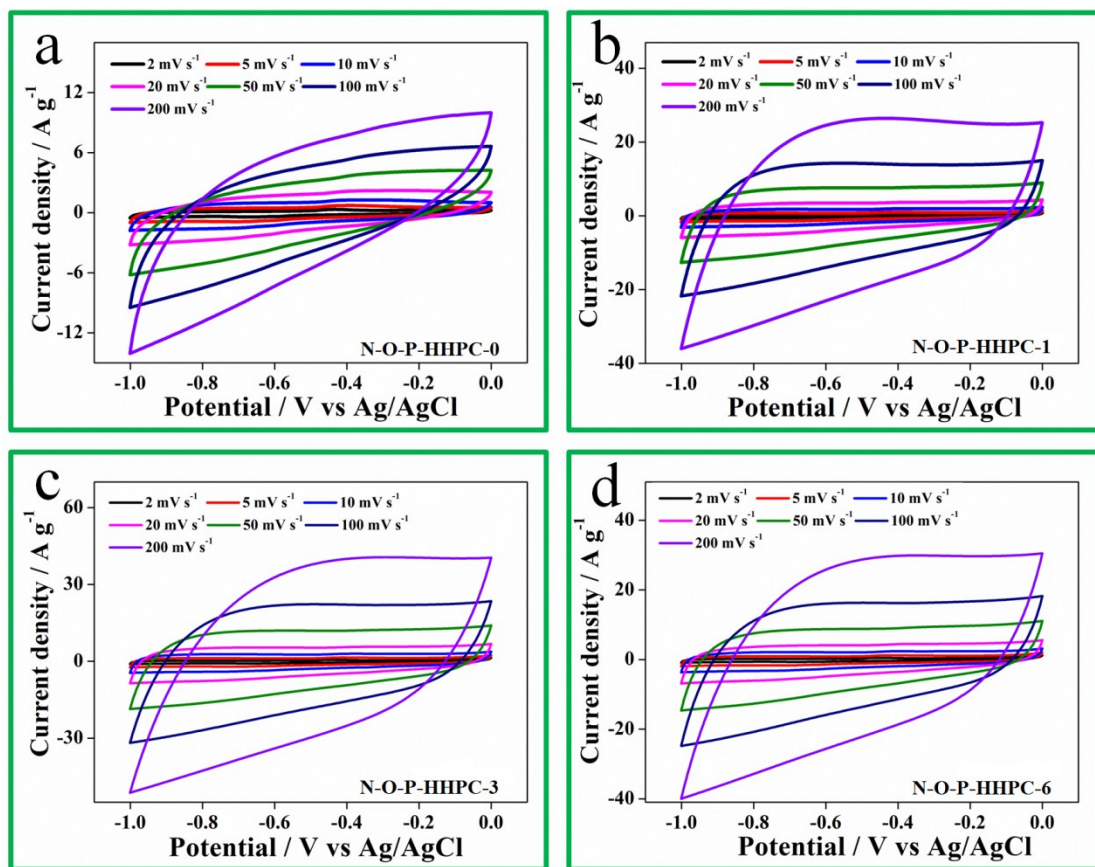

Figure S1 CV curves at different scan rates of N-O-P-HHPC-0 (a), N-O-P-HHPC-1 (b), N-O-P-HHPC-3 (c) and N-O-P-HHPC-6 (d).

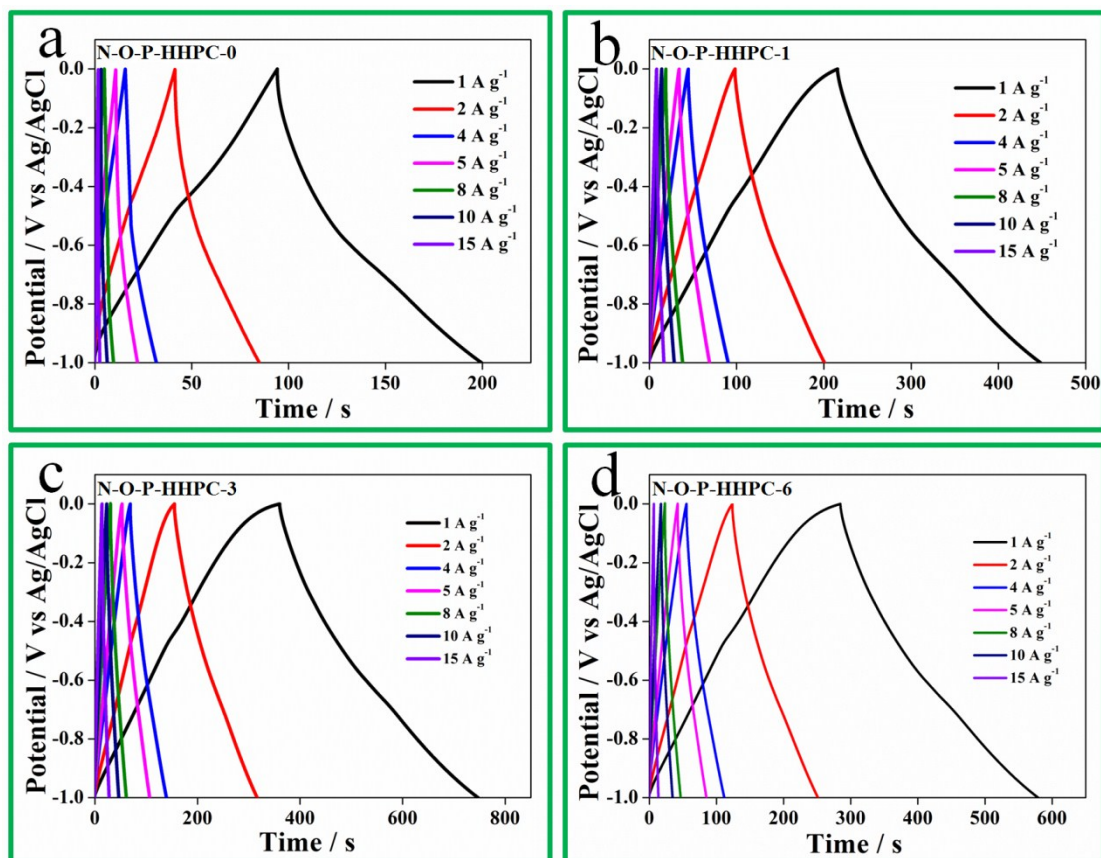

Figure S2 GCD curves at different current densities of N-O-P-HHPC-0 (a), N-O-P-HHPC-1 (b), N-O-P-HHPC-3 (c) and N-O-P-HHPC-6 (d).

Table S1 Electrochemical performances of biomass based carbon material

| Biomass precursor            | SSA (m <sup>2</sup> g <sup>-1</sup> ) | C (F g <sup>-1</sup> ) / Current density (A g <sup>-1</sup> ) | E (W h kg <sup>-1</sup> )/P (W kg <sup>-1</sup> )                                            | Ref.            |
|------------------------------|---------------------------------------|---------------------------------------------------------------|----------------------------------------------------------------------------------------------|-----------------|
| Sugar                        | 1005                                  | 250/1                                                         | 8.7/500 (6 M KOH)                                                                            | [1]             |
| Willow catkin                | 1533                                  | 298/0.5                                                       | 21/180 (1M Na <sub>2</sub> SO <sub>4</sub> )                                                 | [2]             |
| Perilla frutescens           | 655                                   | 270/0.5                                                       | 14.8/490 (1M Na <sub>2</sub> SO <sub>4</sub> )                                               | [3]             |
| Weed                         | 1484                                  | 391/0.5                                                       | 20.15/500 (1M Na <sub>2</sub> SO <sub>4</sub> )                                              | [4]             |
| Chestnut shell               | 691.8                                 | 402.8/0.5                                                     | 26.6/445.5 (1M Na <sub>2</sub> SO <sub>4</sub> )                                             | [5]             |
| Baobab fruit shells          | 1059.3                                | 233.48/1                                                      | 20.86/400 (1M Na <sub>2</sub> SO <sub>4</sub> )                                              | [6]             |
| Tobacco rods                 | 1886                                  | 286.6/1                                                       | 31.3/500(1M Et <sub>4</sub> NBF <sub>4</sub> )                                               | [7]             |
| Coal tar                     | 1517                                  | 274/0.05                                                      | --                                                                                           | [8]             |
| Sunflower stalk              | 1505                                  | 365/1                                                         | 35.7/989 (Et <sub>4</sub> NBF <sub>4</sub> )                                                 | [9]             |
| Yogurt                       | 1300                                  | 225/2                                                         | 7/5000 (6 M KOH)                                                                             | [10]            |
| Boat-fruited sterculia seeds | 3243                                  | --                                                            | 22.4/500 (1M Na <sub>2</sub> SO <sub>4</sub> )                                               | [11]            |
| Tremella                     | 1097                                  | 299.3/0.5                                                     | 42.4/760 (Et <sub>4</sub> NBF <sub>4</sub> )                                                 | [12]            |
| Petroleum asphalt            | 3581                                  | 277/0.05                                                      | 14.2/445 (1M Na <sub>2</sub> SO <sub>4</sub> )                                               | [13]            |
| Straw cellulose waste        | 2297                                  | 312.6/0.5                                                     | 28.6/14090 (Et <sub>4</sub> NBF <sub>4</sub> )                                               | [14]            |
| Broad bean shells            | 655.4                                 | 202/0.5                                                       | --                                                                                           | [15]            |
| Chitosan                     | 1129.6                                | 316/0.2                                                       | --                                                                                           | [16]            |
| Bamboo char                  | 1732                                  | 222/0.5                                                       | 6.7/100 (6 M KOH)                                                                            | [17]            |
| Soybean                      | 1749                                  | 243.2/0.5                                                     | 12.5/450 (0.5 M Na <sub>2</sub> SO <sub>4</sub> )                                            | [18]            |
| Corn straw                   | 1771                                  | 222/1                                                         | --                                                                                           | [19]            |
| Shrimp shells                | 1946                                  | 322/0.5                                                       | 11.2/110 (6 M KOH)                                                                           | [20]            |
| <b>Sophora Japonica</b>      | <b>2068.9</b>                         | <b>386/1</b>                                                  | <b>28.4/449.9 (1M Na<sub>2</sub>SO<sub>4</sub>)</b><br><b>80.8/1500 (EMIMBF<sub>4</sub>)</b> | <b>Our work</b> |

## REFERENCES

- [1] F. Xu, Z. Tang, S. Huang, L. Chen, Y. Liang, W. Mai, *Nat. Commun.*, 2015, **6**, 7221.
- [2] Y. Li, G. Wang, T. Wei, Z. Fan, P. Yan, *Nano Energy*, 2016, **19**, 165-175.
- [3] B. Liu, Y. Liu, H. Chen, M. Yang, H. Li, *J. Power Sources*, 2017, **341**, 309-317.
- [4] W. Zhou, S. Lei, S. Sun, X. Ou, Q. Fu, Y. Xu, *J. Power Sources*, 2018, **402**, 203-212.
- [5] L. Wan, X. Li, N. Li, M. Xie, C. Du, Y. Zhang, *J. Alloy. Compd.*, 2019, **790**, 760-771.
- [6] A. A. Mohammed, C. Chen, Z. Zhu, *J. Colloid Interf. Sci.*, 2019, **538**, 308-319.
- [7] Y. Q. Zhao, M. Lu, P. Y. Tao, Y.J. Zhang, X. T. Gong, Z. Yang, *J. Power Sources*, 2016, **307**, 391-400.
- [8] X. Xie, X. He, X. Shao, S. Dong, N. Xiao, J. Qiu, *Electrochimica Acta*, 2017, **246**, 634-642.
- [9] X. Wang, S. Yun, W. Fang, C. Zhang, X. Liang, Z. Lei, *ACS Sustainable Chem. Eng.*, 2018, **6(9)**, 11397-11407.
- [10] M. Wahid, G. Parte, D. Phase, S. Ogale, *J. Mater. Chem. A*, 2015, **3(3)**, 1208-1215.
- [11] Y. Ding, L. Mo, C. Gao, X. Liu, T. Yu, W. Chen, *ACS Sustainable Chem. Eng.*, 2018, **6(8)**, 9822-9830.
- [12] D. Chen, L. Li, Y. Xi, J. Li, M. Lu, J. Cao, *Electrochimica Acta*, 2018, **286**, 264-270.
- [13] L. Pan, Y. Wang, H. Hu, X. Li, J. Liu, L. Guan, *Carbon*, 2018, **134**, 345-353.
- [14] Z. Chen, X. Wang, B. Xue, Q. Wei, L. Hu, Z. Wang, *ChemSusChem*, 2019, **12(7)**, 1390-1400.

- [15] G. Xu, J. Han, B. Ding, P. Nie, J. Pan, H. Dou, *Green Chem.*, 2015, **17**, 1668-1674.
- [16] Z. Lin, X. Xiang, S. Peng, X. Jiang, L. Hou, *J. Electroanal. Chem.*, 2018, **823**, 563-572.
- [17] Y. Gong, D. Li, C. Luo, Q. Fu, C. Pan, *Green Chem.*, 2017, **19(17)**, 4132-4140.
- [18] G. Lin, R. Ma, Y. Zhou, Q. Liu, X. Dong, J. Wang, *Electrochimica Acta*, 2018, **261**, 49-57.
- [19] Y. Lu, S. Zhang, J. Yin, C. Bai, J. Zhang, Y. Li, *Carbon*, 2017, **124**, 64-71.
- [20] W. Tian, Q. M. Gao, L. M. Zhang, C. Yang, Z. Y. Li, Y. Tan, W. Qian, H. Zhang, *J. Mater. Chem. A*, 2016, **4**, 8690-8699.
